# Supplementary figures and images for: Dehydrocorydaline Accounts the Majority of Anti‐Inflammatory Property of Corydalis Rhizoma in Cultured Macrophage
Source: Hindawi journal article supplement (doi:10.1155/2020/4181696), 2020-01-01

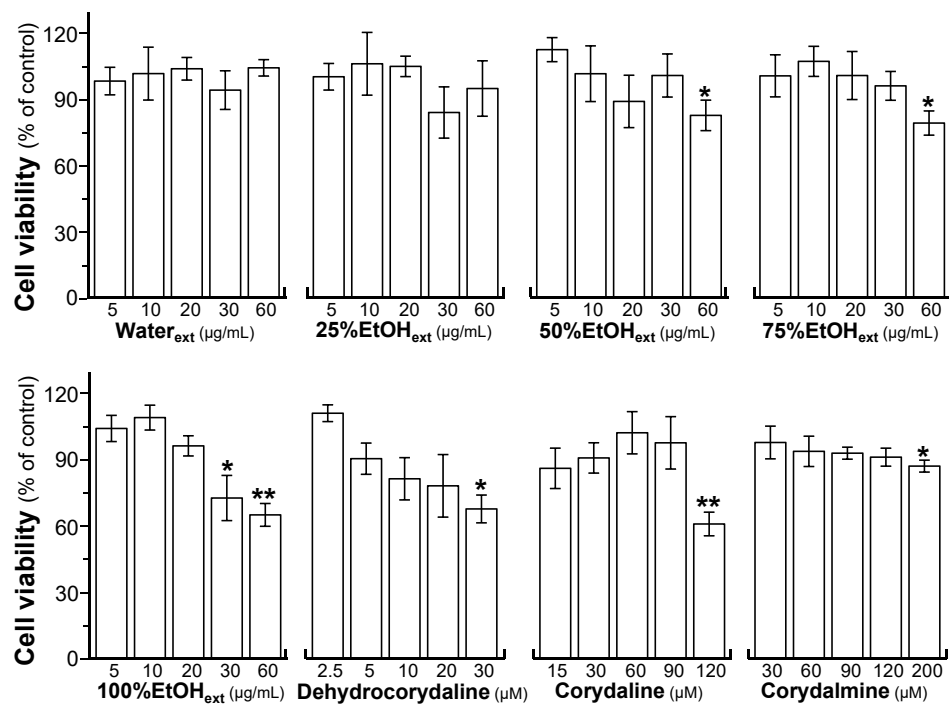

**Figure S1**  
Kong et al., 2020

Supplement: f1 [file 4181696.f1.zip]

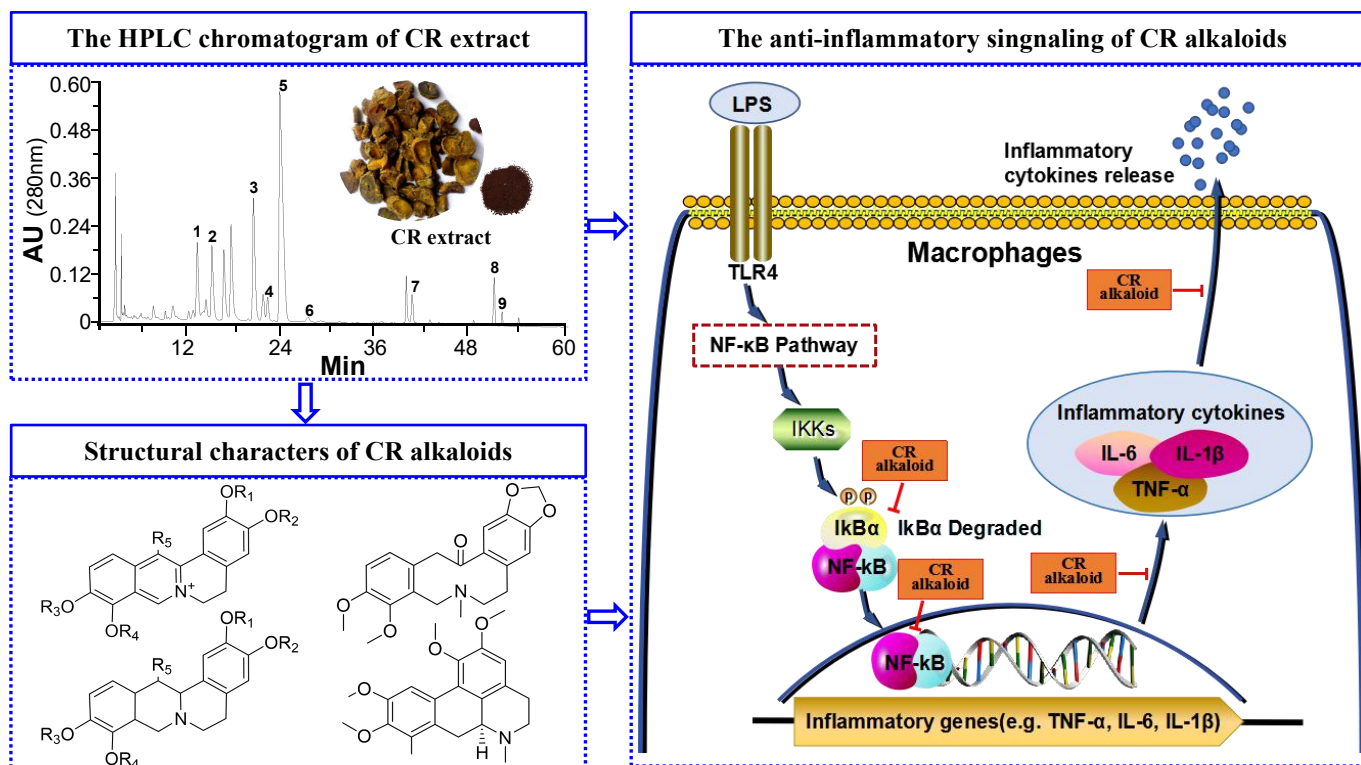

**Graphical abstract**

Supplement: f1 [file 4181696.f1.zip]
